# Supplementary material for: Herpesvirus and neurological manifestations in patients with severe coronavirus disease
Source: Springer Nature journal article supplement (doi:10.1186/s12985-022-01828-9), 2022-06-08
Supplement: MOESM1 [file 23140578]

**Additional file 1.** Sequence of primers, probes and synthetic standard curve of herpesviruses

| <b>virus</b> | <b>Probe (5'-3')</b>       | <b>Primers sense (5'- 3')</b> | <b>Primers anti-sense (5 -3')</b> | <b>Standard curve</b>                                                                       | <b>Reference</b>                            |
|--------------|----------------------------|-------------------------------|-----------------------------------|---------------------------------------------------------------------------------------------|---------------------------------------------|
| HSV-1        | CCCCGCGACCCAGTC            | CCAACCTGCACCATGATCATCGA       | GATGTTTTGTACACGCAACGAA            | TTCGTGATGTTTGTACCCGCAACGACGTATGACGTGGTGCAGGGGATGCGTTTCGATCATGGTGCAGTTGGCTGATA               | Lima et al., 2017                           |
| HSV-2        | CGCGGAGACATTCGAGTACCAGATCG | CGCTCTCGTAAATGCTTCCCT         | TCTACCCACAACAGACCCACG             | ATGCTATCTACCCAGAACAGACCCACGTACGTACGATCTGGTACTCGAATGTCTCCGCGCATGCAGGGAAGCATTACGAGAGCGCTGATC  | Lima et al., 2017                           |
| VZV          | ATTCAGCAATGGAAACACACGACGCC | CGGCATGGCCCGTCTAT             | TCGCGTGTGCGGCC                    | CGATATCGCGTGTCTGCGGCGCTATGGCGTGTGTGTTCCATTGCTGAATCGTGCATAGACGGGCCATGCCGTA                   | Carneiro et al., 2022                       |
| EBV          | TGCAGCTTTGACGATGG          | CCGCTCCTACCTGCAATATCA         | GGAAACCAGGGAGGCAAAATC             | TTCGTGGAACCAGGGAGGCAAAATCCGATCCATCGTCAAAGCTGCAATGCGTTGATATTGCAGGTAGGAGCGGGTGATA             | Fellner et al., 2014                        |
| CMV          | CCGTATTGGTGCAGCTCTGTTCAA   | GGCCGTACTGTCTGCAGGA           | GGCCTCGTAGTAAAATTAATGGT           | TTCGTGGCCTCGTAGTAAAATTAATGGTTCGATTTGAACAGATCGCGCACCAATACGGATGCGTTCCCTGCAGACAGTAACGGCCCTGATA | Raposo et al., 2019                         |
| HHV-6        | TTAGATGGTGTGAGCTGGGATCGGT  | AAAGACATAAATGGCCCTACCT        | GCAAGCTCATGAACATCGTCA             | TTCTGTGCAAGCTCATGAACATCGTACGTATACCGATCCAGCTCACCACCATCTAAATGCGTAGGTAGCGGCAATTTAGGTCTTTCTGATA | Raposo et al., 2019 and Raposo et al., 2020 |
| HHV-7        | CTCGCAGATTGCTTTGGCCATG     | CGGAAGTCACTGGAGTAATGACAA      | CCAATCCTCCGAAACCGAT               | TTCTGTCCAATCCTCCGAAACCGATCGTATATGGCCAAACAGCAATCTGCGAGATGCGTTTGTCACTTCCAGTGACTTCCGCTGATA     | Raposo et al., 2019 and Raposo et al., 2020 |
| HHV-8        | AGATCAAGTTCCGCCATAT        | GGCCCCGGATGATGTA              | GCCCCATAATGACACATTGG              | TTCGTGCCCATAAATGACACATTGGCGTATATATGGCGGAACCTTGATCTATGCGT TACATCATCCGGGGCCCTGATA             | de Oliveira et al., 2020                    |

Sequence of primers, probes and synthetic standard curve used in quantified using real-time PCR
